# Supplementary material
Source: PubMed Central journal article supplement (PMC4782118)
Supplement: supp_WNL.0000000000002440_Supplemental_data.pdf [file supp_WNL.0000000000002440_Supplemental_data.pdf]

**Table e-1. Summary of HT cases from published research.**

| <b>REFERENCE</b>                                                | <b>GENDER/AGE<br/>(years)</b> | <b>ETIOLOGY</b>                                        | <b>SITE OF LESION</b>                                                                                                                                                               |
|-----------------------------------------------------------------|-------------------------------|--------------------------------------------------------|-------------------------------------------------------------------------------------------------------------------------------------------------------------------------------------|
| Holmes G, Brain<br>1904. (1)                                    | F/59                          | Vascular                                               | Midbrain (assumed by author)                                                                                                                                                        |
|                                                                 | F/37                          | Trauma                                                 | Midbrain                                                                                                                                                                            |
|                                                                 | M/21                          | Tumor                                                  | Dorsal half of mid-brain,<br>extended into the thalamus<br>(dorsal and medial nucleus),<br>hippocampal gyrus, upper half<br>of fourth ventricle, left lateral<br>lobe of cerebellum |
|                                                                 | M/6                           | Tumor                                                  | Midbrain (left side)                                                                                                                                                                |
|                                                                 | M/5                           | Not mentioned                                          | Midbrain (left side)                                                                                                                                                                |
|                                                                 | M/15                          | Tumor                                                  | Midbrain (right side) and right<br>optic tract                                                                                                                                      |
|                                                                 | F/37                          | Tumor                                                  | Midbrain                                                                                                                                                                            |
|                                                                 | M/47                          | Vascular                                               | Midbrain (left side)                                                                                                                                                                |
|                                                                 | M/57                          | Vascular                                               | Midbrain (right side)                                                                                                                                                               |
| Kremer W,<br>J Neurol<br>Neurosurg<br>Psychiatry 1947.<br>(28)  | M/34                          | Trauma                                                 | Midbrain                                                                                                                                                                            |
|                                                                 | M/19                          | Trauma                                                 | Midbrain                                                                                                                                                                            |
|                                                                 | M/21                          | Trauma                                                 | Midbrain                                                                                                                                                                            |
| Fujieda T, Br<br>Med J 1974. (14)                               | M/44                          | Vascular                                               | Midbrain?                                                                                                                                                                           |
| Findley L, Br<br>Med J 1980. (15)                               | M/51                          | Vascular (hemorrhage on<br>arteriovenous malformation) | Midbrain (right side)                                                                                                                                                               |
| Andrews J,<br>J Neurol<br>Neurosurg<br>Psychiatry 1982.<br>(35) | M/19                          | Trauma                                                 | Midbrain                                                                                                                                                                            |
|                                                                 | F/22                          | Trauma                                                 | Midbrain                                                                                                                                                                            |
|                                                                 | M/24                          | Trauma                                                 | Midbrain                                                                                                                                                                            |
| Fahn S, Mov<br>Disord 1986. (37)                                | F/54                          | Vascular (hemorrhagic stroke)                          | Subthalamic region and rostral<br>part of left red nucleus                                                                                                                          |
| Biary N,<br>Neurology 1989.<br>(8)                              | M/48                          | Trauma                                                 | Normal MRI                                                                                                                                                                          |
| Koppel B, Mov<br>Disord 1990. (21)                              | M/35                          | Toxoplasma abscess                                     | Midbrain                                                                                                                                                                            |
| Samie M,<br>Neurology 1990.<br>(5)                              | M/42                          | Trauma                                                 | Cavitated lesion in the<br>tegmentum of the left upper<br>pons and gliotic area extending                                                                                           |

|                                                    |      |                                                                                                      |                                                                                                                                            |
|----------------------------------------------------|------|------------------------------------------------------------------------------------------------------|--------------------------------------------------------------------------------------------------------------------------------------------|
|                                                    |      |                                                                                                      | to central midbrain.<br>Pseudohypertrophy of left inferior olivary nucleus                                                                 |
|                                                    | M/21 | Trauma                                                                                               | A retrosilvian mass of the internal cerebral vein was found by angiography. A brainstem involvement is also suspected by his sign/symptoms |
|                                                    | M/21 | Trauma                                                                                               | Midbrain (left)                                                                                                                            |
| Pomeranz S, Acta Neurochir (Wien) 1990. (85)       | F/20 | Tumor (vascular hamartoma irradiated)                                                                | Authors assume that tumor irradiation distorted midbrain                                                                                   |
| Harmon R, Brain Inj 1991. (25)                     | F/36 | Trauma                                                                                               | Right thalamic and Midbrain                                                                                                                |
| Krauss J, J Neurol Neurosurg Psychiatry 1992. (49) | M/25 | Tumor (astrocytoma)                                                                                  | Right thalamus, cyst extending to midbrain                                                                                                 |
|                                                    | M/50 | Tumor (astrocytoma)                                                                                  | Right postero-basal thalamus, red nucleus                                                                                                  |
|                                                    | M/37 | Tumor (astrocytoma)                                                                                  | Right thalamus, internal capsule, pallidum, putamen, corpus callosum, septum pellucidum, right frontal                                     |
|                                                    | M/42 | Tumor (astrocytoma)                                                                                  | Left basal ganglia, hemisphere, corpus callosum (diffuse, multifocal)                                                                      |
|                                                    | M/15 | Tumor (astrocytoma)                                                                                  | Left pallidum, putamen, corona radiata, compression of thalamus                                                                            |
|                                                    | M/12 | Tumor (astrocytoma)                                                                                  | Right thalamus, quadrigeminal plate                                                                                                        |
| Friedman J, Mov Disord 1992. (86)                  | M/19 | Drug induced HT (the patient had an old trauma and when the neuroleptic was introduced, HT appeared) | Right thalamus (dorsomedial nuclei) and right frontal lobe convexity                                                                       |
| Okuda B, Stroke 1993. (64)                         | F/57 | Vascular (ischemic)                                                                                  | Paramedian midbrain tegmentum                                                                                                              |
| De Recondo A, Rev Neurol (Paris) 1993. (36)        | F/30 | Trauma (hemorrhagic)                                                                                 | Midbrain and right thalamus                                                                                                                |
| Mosutto-Agatiello L, J Neurol 1993. (38)           | F/53 | Vascular (hemorrhagic)                                                                               | Left thalamic hemorrhage with extension to subthalamus                                                                                     |
| Defer G, J Neurol Neurosurg                        | M/25 | Vascular (hemorrhage on arteriovenous malformation)                                                  | Right midbrain, subthalamic and thalamic areas, and right superior cerebellar peduncle                                                     |

|                                                 |      |                                                                                                                                  |                                                                                                                                                                                                      |
|-------------------------------------------------|------|----------------------------------------------------------------------------------------------------------------------------------|------------------------------------------------------------------------------------------------------------------------------------------------------------------------------------------------------|
| Psychiatry 1994. (11)                           |      |                                                                                                                                  |                                                                                                                                                                                                      |
| Krack P, Mov Disord 1994. (72)                  | M/26 | Trauma                                                                                                                           | Right temporal subdural hematoma (evacuated). Right-sided upper cerebellar peduncle extending into the midbrain, right locus coeruleus and the lower dorsolateral part of the right substantia nigra |
| Remy P, Neurology 1995. (3)                     | F/31 | Trauma                                                                                                                           | Upper peduncle and thalamus                                                                                                                                                                          |
|                                                 | M/41 | Trauma (bullet)                                                                                                                  | Upper peduncle                                                                                                                                                                                       |
|                                                 | M/46 | Vascular (hemorrhagic stroke)                                                                                                    | Upper peduncle                                                                                                                                                                                       |
|                                                 | M/25 | Vascular (hemorrhage on arteriovenous malformation)                                                                              | Upper peduncle and thalamus                                                                                                                                                                          |
|                                                 | M/54 | Vascular (hemorrhagic stroke)                                                                                                    | Upper peduncle and thalamus                                                                                                                                                                          |
|                                                 | M/32 | Trauma (hemorrhage)                                                                                                              | Upper peduncle and subthalamic region                                                                                                                                                                |
| Shepherd G, Mov Disord 1997 (10)                | M/52 | Vascular (hemorrhage)                                                                                                            | Left pontine                                                                                                                                                                                         |
| Govaerts A, Mov Disord 1998. (89)               | M/67 | Vascular (posthypoxic)                                                                                                           | Bilateral lesions in the head of the caudate nucleus and in the anterior part of the putamen                                                                                                         |
| Jacob P, Mov Disord 1998. (88)                  | M/24 | Trauma (hemorrhagic)                                                                                                             | Left midbrain, thalamus and medial temporal lobe                                                                                                                                                     |
| Simonetti F, Mov Disord 1998. (90)              | F/67 | Paraneoplastic                                                                                                                   | No structural abnormalities in brain MRI                                                                                                                                                             |
| Deuschl G, Ann Neurol 1999. (59)                | M/59 | Initially right-sided cerebellar ablation for a Lindau tumor and 17 years later he developed Parkinson's disease with a right HT | Right cerebellum and nigrostriatal system                                                                                                                                                            |
| Miyagi Y, J Neurol 1999. (63)                   | M/49 | Vascular (hemorrhage)                                                                                                            | Left pontine tegmentum                                                                                                                                                                               |
| Leung G, Mov Disord 1999. (84)                  | M/42 | Vascular (cavernoma hemorrhage)                                                                                                  | From lower aspect of right thalamus to the upper aspect of pons including midbrain tegmentum                                                                                                         |
| Weng Y, Ghung Med J 2000. (62)                  | F/28 | Vascular (hemangioma: hemorrhage)                                                                                                | Left midbrain                                                                                                                                                                                        |
| Kudo M, Mov Disord 2001. (80)                   | F/67 | Vascular (cavernoma hemorrhage)                                                                                                  | Right upper brainstem (pons and midbrain)                                                                                                                                                            |
| Pezzini A, Parkinsonism Relat Disord 2002. (19) | 46   | Toxoplasma abscess                                                                                                               | Right thalamus and midbrain                                                                                                                                                                          |
| Kim M, J Neurol                                 | M/26 | Tumoral (germinoma)                                                                                                              | Midbrain tegmentum                                                                                                                                                                                   |

|                                                           |      |                                                                                   |                                                                                    |
|-----------------------------------------------------------|------|-----------------------------------------------------------------------------------|------------------------------------------------------------------------------------|
| Neurosurg<br>Psychiatry 2002.<br>(33)                     |      |                                                                                   |                                                                                    |
| Mattos J, Arq<br>Neuropsiquiatr<br>2002. (20)             | M/34 | Mass (co-infection of<br>tuberculosis and toxoplasmosis<br>in an HIV patient)     | Left midbrain and left<br>cerebellar hemisphere                                    |
| Teive H, Mov<br>Disord 2002. (92)                         | M/34 | Neuroparacoccidiomycosis                                                          | Midbrain (right side)                                                              |
| Rieder C, Arq<br>Neuropsiquiatr<br>2003. (4)              | M/48 | Vascular (hemorrhage)                                                             | Left pontine tegmentum,<br>midbrain and thalamus                                   |
| Romanelli P, J<br>Neurosurg 2003.<br>(74)                 | M/79 | Undetermined cause                                                                | Normal neuroimaging studies                                                        |
| Samadani U, J<br>Neurosurg 2003.<br>(87)                  | M/24 | Vascular (cavernoma<br>hemorrhage)                                                | Left midbrain                                                                      |
| Goto S, J Neurol<br>Neurosurg<br>Psychiatry 2004.<br>(58) | M/53 | Vascular (hemorrhage)                                                             | Left pontine                                                                       |
| Nikkhah G, J<br>Neurosurg 2004.<br>(71)                   | F/47 | Vascular (infarction)                                                             | Midbrain                                                                           |
|                                                           | F/32 | Vascular (hemorrhage on<br>arteriovenous malformation and<br>two small aneurisms) | Left midbrain and thalamic<br>region, extending to the left<br>occipital lobe      |
| Foote K,<br>Neurosurgery<br>2005. (91)                    | M/8  | Trauma                                                                            | MRI normal                                                                         |
| Paviour , Mov<br>Disord 2006. (31)                        | M/25 | Vascular (cavernoma<br>hemorrhage)                                                | Left of the midline in the<br>upper brainstem                                      |
| Chiou T, J<br>Neurosurg 2006.<br>(57)                     | M/20 | radiosurgery adverse event<br>(arteriovenous malformation)                        | Left thalamus extending to the<br>tegmentum                                        |
| Akkus D, Mov<br>Disord 2006. (69)                         | M/57 | Vascular (infarction)                                                             | Midbrain infarction involving<br>right red nucleus and<br>substantia nigra regions |
| Hertel F, J<br>Neurosurg 2006.<br>(77)                    | M/58 | Vascular (infarction)                                                             | Midbrain                                                                           |
| Tan J, Mov<br>Disord 2006. (70)                           | F/53 | Hyperglycemic                                                                     | Reversible. No MRI<br>abnormalities                                                |
| Strecker K, Eur J<br>Meurol 2007.<br>(27)                 | M/51 | Abscess (opportunistic infection<br>in HIV patient)                               | Midbrain (red nucleus,<br>substantia nigra and cerebral<br>peduncle)               |
| Zhong J, Chin<br>Med J 2007. (29)                         | F    | Vascular (cavernoma<br>hemorrhage)                                                | Midbrain                                                                           |
| Roselli F, Mov<br>Disord 2007. (67)                       | M/56 | Brainstem encephalitis (Herpes<br>Simplex Virus-1)                                | Right cerebral peduncle                                                            |

|                                                    |      |                                                                                                                         |                                                                                                                                                                  |
|----------------------------------------------------|------|-------------------------------------------------------------------------------------------------------------------------|------------------------------------------------------------------------------------------------------------------------------------------------------------------|
| Inci S, Surg Neurol 2007. (68)                     | F/60 | Vascular (ossified cavernoma)                                                                                           | Thalamo-mesencephalic junction                                                                                                                                   |
| Walker M, Mov Disord 2007. (30)                    | M/43 | Vascular (cavernoma hemorrhage)                                                                                         | Right tectum pontis through the dorsal midbrain and olivary hypertrophy                                                                                          |
| Peker S, Childs Nerv Syst 2008. (55)               | F/14 | Cerebral abscess                                                                                                        | Right thalamus                                                                                                                                                   |
| Sato S, Cerebrovasc Dis 2008. (61)                 | M/80 | Vascular (infarction)                                                                                                   | Caudal paramedian midbrain                                                                                                                                       |
| Yerdelen D, Eur J Neurol 2008. (66)                | F/38 | Demyelinating (multiple sclerosis)                                                                                      | Pons, midbrain and supratentorial plaques                                                                                                                        |
| Ferlazzo E, Mov Disord 2008. (78)                  | M/19 | Trauma (contusion)                                                                                                      | Left midbrain                                                                                                                                                    |
| Kim D, Mov Disord 2009. (33)                       | F/81 | Vascular (infarction). The patient had preexisting Parkinson's disease and after cerebellar infarction she developed HT | Left cerebellar hemisphere                                                                                                                                       |
| Baysal L, J Neurol 2009. (50)                      | F/54 | Vascular (infarction)                                                                                                   | Right midbrain, bilateral hemispheres of the cerebellum, right thalamus and the right occipital lobe                                                             |
| Sanborn M, Stereotact Funct Neurosurg 2009 (75)    | M/31 | Multilobulated, multiseptated cystic degeneration lesion                                                                | Between thalamus and pons                                                                                                                                        |
| Striano P, BMJ Case Rep 2009. (51)                 | M/61 | Vascular (hemorrhage)                                                                                                   | Left cerebellar hemisphere                                                                                                                                       |
| Seidel S, J Neurol Neurosurg Psychiatry 2009. (65) | F/16 | Vascular (cavernoma hemorrhage)                                                                                         | Pontine tegmentum, midbrain tegmentum involving almost the entire left-sided substantia nigra, red nucleus and components of the ipsilateral corticospinal tract |
| Shen Y, World J Biol Psychiatry 2009 (83)          | M/23 | Drug induced (risperidone)                                                                                              |                                                                                                                                                                  |
| Gajos A, Acta Neurol Scand 2010. (7)               | M/25 | Vascular (hemorrhage on arteriovenous malformation)                                                                     | Right thalamus                                                                                                                                                   |
|                                                    | M/25 | Vascular (cavernoma hemorrhage)                                                                                         | Midbrain tegmentum, right substantia nigra, superior cerebellar peduncle                                                                                         |
|                                                    | F/68 | Vascular (hemorrhagic stroke)                                                                                           | Left thalamus                                                                                                                                                    |
|                                                    | M/63 | Vascular (infarction)                                                                                                   | Superior cerebellar peduncle and left pons                                                                                                                       |
|                                                    | F/15 | Vascular (infarction)                                                                                                   | Right thalamus                                                                                                                                                   |

|                                     |      |                                                                                                                      |                                                                                                                       |
|-------------------------------------|------|----------------------------------------------------------------------------------------------------------------------|-----------------------------------------------------------------------------------------------------------------------|
|                                     | F/27 | Vascular (infarction)                                                                                                | Right thalamus                                                                                                        |
|                                     | M/37 | Vascular (hemorrhagic stroke)                                                                                        | Rubro-olivocerebellorubral loop, rubro-spinal fibers, nigro-striatal fibers                                           |
|                                     | F/20 | Trauma                                                                                                               | Midbrain tegmentum                                                                                                    |
|                                     | M/10 | Trauma                                                                                                               | No visible pathology                                                                                                  |
|                                     | F/42 | Vascular (infarction)                                                                                                | Left thalamus                                                                                                         |
| Lekoubou A, BCM Neurol 2010. (18)   | M/35 | Infection (toxoplasma abscess)                                                                                       | Right thalamus and internal capsule with edema extending downward to the upper mesencephalum                          |
| Schreuder F, Neurology 2010. (46)   | M/69 | Vascular (infarction)                                                                                                | Left medioventral midbrain                                                                                            |
| Acar G, Neurol Res 2010. (47)       | M/31 | Vascular (perimesencephalic subarachnoid hemorrhage)                                                                 | Tetra-ventricular subarachnoid hemorrhage, parenchymal hemorrhage in tectum mesencephali on the left side             |
| Grover P, BMJ Case Rep 2010. (48)   | F/71 | Tumoral                                                                                                              | Right thalamus                                                                                                        |
| Reese R, Mov Disord 2011. (60)      | M/31 | Trauma (Left subdural hemorrhage: evacuated)                                                                         | MRI of high resolution showed no abnormalities (dopaminergic striatal denervation proven by SPECT)                    |
| Brittain J, Mov Disord 2011. (79)   | 36   | Vascular (infarction)                                                                                                | Right cerebellum extending to midbrain                                                                                |
| Coumou A, Mov Disord 2012. (23)     | M/25 | Suprasellar arachnoid cyst (acting by compression)                                                                   | Midbrain                                                                                                              |
| Boelmans K, Mov Disord 2012. (17)   | F/39 | Polycystic tumor                                                                                                     | From the right diencephalic region into the mesencephalon and pons.                                                   |
| Suda S, J Neurol 2012. (53)         | F/68 | Vascular (aneurism of basilar artery/right superior cerebellar artery, intraparenchymal and subarachnoid hemorrhage) | Right midbrain                                                                                                        |
| Rana A, Acta Neurol Belg 2012. (81) | M/76 | Vascular (infarction)                                                                                                | Left midbrain and thalamic area                                                                                       |
|                                     | M/65 | Vascular (hemorrhage)                                                                                                | Hematoma in the inferior fourth ventricle, right thalamus, right posterior pons, and right anterior lentiform nucleus |
|                                     | M/59 | Trauma (hemorrhage)                                                                                                  | Bilateral frontal intraparenchymal hemorrhages, mild bleed in anterior interhemispheric                               |

|                                                          |      |                                                                                                      |                                                                                                                      |
|----------------------------------------------------------|------|------------------------------------------------------------------------------------------------------|----------------------------------------------------------------------------------------------------------------------|
|                                                          |      |                                                                                                      | fissure, right midbrain involving the cerebral peduncle, left temporal contusion and a right subdural hematoma       |
| Aydin S, J Neurol Surg A Cent Eur Neurosurg 2012         | M/30 | Vascular (cavernoma hemorrhage)                                                                      | Midbrain and pons                                                                                                    |
| Woo J, Ann Rehabil Med 2013. (16)                        | F/70 | Vascular (hemorrhage)                                                                                | Brachium pontis to the dorsal midbrain                                                                               |
| Kipfer S, Mov Disord 2013 (22)                           | F/63 | Vascular (infarction)                                                                                | Pons (olivary hypertrophy)                                                                                           |
| Castrop F, Mov Disord 2013. (24)                         | 43   | Vascular (hemorrhagic stroke)                                                                        | Midbrain                                                                                                             |
|                                                          | 40   | Vascular (hemorrhage on arteriovenous malformation)                                                  | Pontomesencephalic                                                                                                   |
| Aydin S, J Neurol Surg A Cent Eur Neurosurg 2013. (40)   | M/30 | Vascular (cavernoma hemorrhage)                                                                      | Superior and inferior colliculus in the right tegmentum and right red nucleus with extension to the substantia nigra |
| Ahn S, Ann Rehabil Med 2014. (42)                        | M/29 | Vascular (hemorrhage)                                                                                | Left pons                                                                                                            |
| Menon B, J Mov Disord 2014. (32)                         | F/35 | Epidermoid cyst                                                                                      | Middle fossa and temporal                                                                                            |
| Follet M, Neuromodulation 2014. (39)                     | F/69 | Trauma                                                                                               | Midbrain, thalamus                                                                                                   |
| Menendez F, Tremor Other Hyperkinet Mov (N Y) 2014. (44) | M/27 | Vascular (cavernoma hemorrhage)                                                                      | Right midbrain                                                                                                       |
| Chhetri S, Parkinsonism Relat Disord 2014. (56)          | M/51 | Vascular (hemorrhage)                                                                                | Right side of midbrain which extended to the pontomedullary junction (right hypertrophic olivary degeneration)       |
| Katchanov J, Neurology 2014. (54)                        | M/47 | Opportunistic infection (progressive multifocal leukoencephalopathy isolated to the posterior fossa) | Right middle cerebellar peduncle                                                                                     |
| Kim M, J Cerebrovasc Endovasc Neurosurg 2014. (43)       | F/54 | Vascular (hypertensive hemorrhage)                                                                   | Pons (bilateral hypertrophic olivary degeneration)                                                                   |
| Bolen R, J Neurol                                        | M/53 | Vascular (hypertensive                                                                               | Pons, midbrain (red nucleus),                                                                                        |

|                                                 |      |                                                                                       |                                                                                           |
|-------------------------------------------------|------|---------------------------------------------------------------------------------------|-------------------------------------------------------------------------------------------|
| Sci 2014. (73)                                  |      | hemorrhage)                                                                           | and left hypertrophic olivary degeneration                                                |
| Kobayashi K, J Neurosurg 2014. (76)             | F/19 | Tumor (leukemia hemorrhage)                                                           | Brainstem and cerebellum                                                                  |
|                                                 | M/67 | Vascular (infarction)                                                                 | Superior cerebellar peduncle And cerebellar hemisphere                                    |
|                                                 | M/44 | Vascular (hemorrhage)                                                                 | Midbrain                                                                                  |
|                                                 | M/18 | Trauma                                                                                | Midbrain                                                                                  |
| Grabska N, Neurol Neurochir Pol 2014. (52)      | F/15 | Vascular (infarction)                                                                 | Upper-posterior-lateral part of the left thalamus, ranging to the Vim nucleus             |
| Gunnes V, Surg Neurol Int 2014. (45)            | F/57 | Infectious (progressive multifocal leukoencephalopathy in an immunocompetent patient) | Left midbrain                                                                             |
| Ridz D, J Neurol Neurosug Psychiatry 2015. (82) | F/80 | Anti-Yo cerebellar atrophy                                                            | Microscopic involvement of red nucleus, inferior olivary nucleus and cerebellum (autopsy) |

**Table e-2. Summary of cases reported in published research treated with DBS.**

| <b>Reference</b>                  | <b>Surgical target</b> | <b>Unilateral/Bilateral</b> | <b>Deep brain stimulation parameters</b>                                                                                                            | <b>Evolution</b>                                                                                   |
|-----------------------------------|------------------------|-----------------------------|-----------------------------------------------------------------------------------------------------------------------------------------------------|----------------------------------------------------------------------------------------------------|
| Kudo M, Mov Disord 2001 (80)      | VIM                    | Bilateral                   | Using the most distal electrode with a plus polarity and the third electrode with a minus polarity, 100 µsec, right: 2.2 V, left: 1.7 V, 120-150 Hz | DBS produced almost complete disappearance of her head and arm tremor                              |
| Samadani U, J Neurosurg 2003 (87) | VIM                    | Unilateral (L)              | 1-, 2+, 90 µseg, 185 Hz                                                                                                                             | Resting and action tremor of the patient's right arm and trunk were extinguished by initiating DBS |
| Romanelli P, Mov Disord 2003 (74) | VIM and STN            | Unilateral (L)              | VIM: 0-, 3-, C+, 2 V, 90 µseg, 145 Hz<br>STN: 0-,1-,2-,3-,C+, 4.3 V, 90 µseg, 185 Hz                                                                | Vim: poor control of resting tremor, partial resolution of postural                                |



|                                                 |                           |                |                                                                                       |                                                                                                                                                                                                        |
|-------------------------------------------------|---------------------------|----------------|---------------------------------------------------------------------------------------|--------------------------------------------------------------------------------------------------------------------------------------------------------------------------------------------------------|
|                                                 |                           |                |                                                                                       | tremor, complete resolution of intention tremor. STN: resolution of resting tremor but no effect on postural and intention tremor. When Vim and STN were stimulated: complete resolution of the tremor |
| Goto S, J Neurol Neurosurg Psychiatry 2004 (58) | VIM and Pallidotomy (GPi) | Unilateral (L) | 0-, 1+, 3.4 V, 90 $\mu$ seg, 160 Hz                                                   | VIM: suppressed distal tremor, but did not control proximal tremor<br>Pallidotomy completely abolished his proximal tremor                                                                             |
| Nikkhah G, J Neurosurg 2004 (71)                | Patient 1: VIM            | Unilateral (R) | 2.4 V, 60 $\mu$ seg, 130 Hz. Contacts not specified                                   | Left side tremor improved almost completely, rigidity in her left arm and the hemidystonia were significantly alleviated, postural instability improved considerably                                   |
|                                                 | Patient 2: VIM            | Unilateral (L) | 3.4 V, 90 $\mu$ seg, 130 Hz. Contacts not specified                                   | 80% improvement of tremor and of the dystonic posture of the right arm                                                                                                                                 |
| Foot K, Neurosurgery 2005 (91)                  | VIM and VOA/VOP border    | Unilateral (R) | VIM: C+, 2-, 4.1 V, 90 $\mu$ seg, 135 Hz<br>VOA/VOP: C+, 0-, 4V, 90 $\mu$ seg, 185 Hz | The patient experienced a marked and sustained improvement (at the 6- and 12-month follow-up examinations) in tremor and disability                                                                    |
| Hertel F, J Neurosurg 2006.                     | VIM                       | Unilateral (R) | They do not describe DBS                                                              | They followed the patient for                                                                                                                                                                          |

|                                                       |                           |                    |                                                                         |                                                                                                                                                                                                                                       |
|-------------------------------------------------------|---------------------------|--------------------|-------------------------------------------------------------------------|---------------------------------------------------------------------------------------------------------------------------------------------------------------------------------------------------------------------------------------|
| (77)                                                  |                           |                    | parameters                                                              | 1.5 years                                                                                                                                                                                                                             |
| Peker S, Childs Nerv Syst 2008. (55)                  | VIM                       | Unilateral (R)     | C +, 3 -, 4.8 V, 120 µseg, 180 Hz.                                      | Improvement of 90% with a follow up of 30 months                                                                                                                                                                                      |
| Sanborn M, Stereotact Funct Neurosurg 2009 (75)       | VIM                       | Unilateral (R)     | VIM: 1.6 V, no other parameter mentioned                                | They followed the patient for 24 months with full suppression of tremor                                                                                                                                                               |
| Acar G, Neurol Res 2010 (47)                          | VIM                       | Bilateral          | Case +, distal contact-, 4 V, 90 µseg, 185 Hz                           | At third month suppressed both extremity and orolingual tremors                                                                                                                                                                       |
| Reese R, Mov Disord 2011 (60)                         | Dorsolateral STN and VIM  | Unilateral (R)     | STN: C+, 2-2.6 V, 60 µseg, 30 Hz.<br>VIM: C+,5-, 1.5 V, 90 µseg, 130 Hz | Kinetic tremor required VIM stimulation. The others components responded to STN stimulation                                                                                                                                           |
| Brittain J, Mov Disord 2011. (79)                     | Left VOP/<br>Zona incerta | Unilateral (L)     | 0-, 3+, 4.1 V, 120 µseg, 100 Hz                                         | Rest and postural tremor were abolished. Partial suppression of intention tremor                                                                                                                                                      |
| Castrop F, Mov Disord 2013 (24)                       | Patient 1:<br>VIM (2004)  | Unilateral (L)     | Case +, 0 -, 4.9 V, 60 µseg, 130 Hz                                     | DBS produced good tremor suppression, whereas the other symptoms remained unchanged.<br>Both patients remained on DBS until 2011, on that date the stimulation was turned off with no reappearance of tremor at one year of follow up |
|                                                       | Patient 2:<br>VIM (2005)  | Unilateral (L)     | Case +, 1-, 2.0 V, 60 µseg, 130 Hz                                      |                                                                                                                                                                                                                                       |
| Aydin S, J Neurol Surg A Cent Eur Neurosurg 2013 (40) | VIM and GPi               | Unilateral (right) | VIM: 3 V, 90 µseg, 100 Hz<br>GPi: 3V, 210 µseg, 130 Hz                  | Follow up of 6 months<br>Resting tremor: moderate improvement<br>Postural tremor: moderate improvement                                                                                                                                |

|                                                                                                                                                                                                                                      |                                                                                                                                                        |                   |                                                                                |                                                                                                                                                                                                                                                              |
|--------------------------------------------------------------------------------------------------------------------------------------------------------------------------------------------------------------------------------------|--------------------------------------------------------------------------------------------------------------------------------------------------------|-------------------|--------------------------------------------------------------------------------|--------------------------------------------------------------------------------------------------------------------------------------------------------------------------------------------------------------------------------------------------------------|
|                                                                                                                                                                                                                                      |                                                                                                                                                        |                   |                                                                                | Intention tremor: minimal improvement                                                                                                                                                                                                                        |
| Kobayashi K, J<br>Neurosurg 2014<br>(76)                                                                                                                                                                                             | STN and VIM                                                                                                                                            | Unilateral        | 135 Hz, 210 µseg.<br>The contacts were not specified.<br>Voltage not specified | Mean follow-up of these four patients was 25,8 +/- 35 months                                                                                                                                                                                                 |
|                                                                                                                                                                                                                                      | STN and VIM                                                                                                                                            | Unilateral        | 135 Hz, 210 µseg.<br>The contacts were not specified.<br>Voltage not specified |                                                                                                                                                                                                                                                              |
|                                                                                                                                                                                                                                      | STN and VIM                                                                                                                                            | Unilateral        | 135 Hz, 210 µseg.<br>The contacts were not specified.<br>Voltage not specified |                                                                                                                                                                                                                                                              |
|                                                                                                                                                                                                                                      | STN and VIM                                                                                                                                            | Unilateral        | 135 Hz, 210 µseg.<br>The contacts were not specified.<br>Voltage not specified |                                                                                                                                                                                                                                                              |
| Grabska N,<br>Neurol Neurochir<br>Pol 2014. (52)                                                                                                                                                                                     | Area between ventralis oralis anterior and zona incerta (The choice of this target was based on the best reduction of the tremor during the operation) | Unilateral (left) | C+, 0 - (ZI), 2 - (Voa/Vop), 1.8 V, 185 Hz, 60 µseg                            | The improvement of postural and resting tremor was significant. Task-specific tremor was slightly reduced. Tremor of the right lower limb and ataxia in the upper one did not change. The device had to be explanted due to infection, and tremor reappeared |
| Follet MA,<br>Neuromodulation<br>2014. (39)                                                                                                                                                                                          | VIM                                                                                                                                                    | Bilateral         | Left: C+, 0-, 2 V, 60 µseg, 185 Hz<br>Right: C+, 1-, 2.5 V, 185 Hz             | Follow up of 18 (L) and 12 (R) months. She had functionally significant improvement in tremor                                                                                                                                                                |
| DBS: deep brain stimulation, STN: Subthalamic nucleus, VIM: ventralis intermedius nucleus, VOP: Ventralis oralis posterior, VOA: Ventralis oralis anterior, GPi: Globus pallidus internal part, ZI: zona incerta, R: right, L: left. |                                                                                                                                                        |                   |                                                                                |                                                                                                                                                                                                                                                              |

Figure e-1: MRI (case 16) showing a post-traumatic lesion of left midbrain and left posterior thalamus

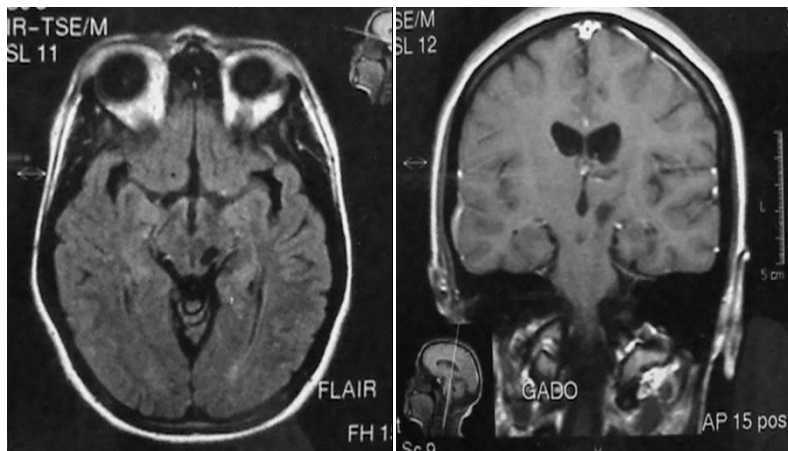

## e-References

- e-1) Kim MC, Son BC, Miyagi Y, Kang JK. Vim thalamotomy for Holmes' tremor secondary to midbrain tumour. *J Neurol Neurosurg Psychiatry* 2002;73:453-455.
- e-2) Ahn SY, Kim DA, Park YO, Shin JH. Effect of ultrasonography-guided botulinum toxin type a injection in holmes' tremor secondary to pontine hemorrhage: case report. *Ann Rehabil Med* 2014;38:694-697.
- e-3) Kim MK, Cho BM, Park SH, Yoon DY. Holmes' tremor associated with bilateral hypertrophic olivary degeneration following brain stem hemorrhage: a case report. *J Cerebrovasc Endovasc Neurosurg* 2014;16:299-302.
- e-4) Menéndez DF, Cury RG, Barbosa ER, Teixeira MJ, Fonoff ET. Hypertrophic olivary degeneration and Holmes' tremor secondary to bleeding of cavernous malformation in the midbrain. *Tremor Other Hyperkinet Mov (NY)* 2014;4:264.
- e-5) Gunnes VR, Doods G, Wauschkuhn B, Feiden W, Hertel F. Holmes tremor in a patient with progressive multifocal leukoencephalopathy. *Surg Neurol Int* 2014;5(Suppl 8):S413-S415.
- e-6) Schreuder FH, Hamers RM, van Domburg PH. Teaching NeuroImages: Holmes tremor after midbrain stroke. *Neurology* 2010;75:e10.
- e-7) Acar G, Acar F, Bir LS, Kizilay Z, Cirak. Vim stimulation in Holmes' tremor secondary to subarachnoid hemorrhage. *Neurol Res* 2010;32:992-994.

- e-8) Grover PJ. Thalamic tumour presenting with Holmes' tremor: diagnostic difficulties. *BMJ Case Rep* 2010;2010:2432.
- e-9) Krauss JK, Nobbe F, Wakhloo AK, Mohadjer M, Vach W, Munding F. Movement disorders in astrocytomas of the basal ganglia and the thalamus. *J Neurol Neurosurg Psychiatry* 1992;55:1162-1167.
- e-10) Baysal L, Acarer A, Celebisoy N. Post-ischemic Holmes' tremor of the lower extremities. *J Neurol* 2009;256:2079-2081.
- e-11) Striano P, Elefante A, Coppola A, Tortora F, Zara F, Minetti C. Dramatic response to levetiracetam in post-ischaemic Holmes' tremor. *BMJ Case Rep* 2009;2009:bcr08.2008.0643.
- e-12) Grabska N, Rudzinska M, Dec-Cwiek M, et al. Deep brain stimulation in the treatment of Holmes tremor – a long term-term case observation. *Neurol Neurochir Pol* 2014;48:292-295.
- e-13) Suda S, Yamazaki M, Katsura K, et al. Dramatic response to zonisamide of post-subarachnoid hemorrhage Holmes' tremor. *J Neurol* 2012;259:185-187.
- e-14) Katchanov J, Branding G. Teaching video neuroimages: Holmes tremor in progressive multifocal leukoencephalopathy isolated to the posterior fossa. *Neurology* 2014;82:e8.
- e-15) Peker S, Isik U, Akgun Y, Ozek M. Deep brain stimulation for Holmes' tremor related to a thalamic abscess. *Childs Nerv Syst* 2008;24:1057-1062.
- e-16) Chhetri SK, Boothman B, Haq MA, Mathur S, Majeed T. Holmes' and palatal tremor following brainstem haemorrhage. *Parkinsonism Relat Disord* 2014;20:673-675.
- e-17) Chiou TS, Tsai CH, Lee YH. Unilateral Holmes tremor and focal dystonia after Gamma Knife surgery. *J Neurosurg.* 2006;105 Suppl:235-237.
- e-18) Goto S, Yamada K. Combination of thalamic Vim stimulation and GPi pallidotomy synergistically abolishes Holmes' tremor. *J Neurol Neurosurg Psychiatry.* 2004;75:1203-1204.
- e-19) Deuschl G, Wilms H, Krack P, Würker M, Heiss WD. Function of the cerebellum in Parkinsonian rest tremor and Holmes' tremor. *Ann Neurol* 1999;46:126-128.
- e-20) Reese R, Herzog J, Falk D. et al. Successful Deep Brain Stimulation in a Case of Posttraumatic Tremor and Hemiparkinsonism. *Mov Disord* 2011, 26:1954-1955.
- e-21) Sato S, Toyoda K, Kawase K, Kasuya J, Minematsu K. A caudal mesencephalic infarct presenting only with tetra-ataxia and tremor. *Cerebrovasc Dis* 2008;25:187-189.
- e-22) Weng YH, Kao PF, Tsai CH, Yen TC, Lu CS. Dopamine deficiency in rubral tremor caused by midbrain hemangioma: case report. *Ghang Gung Med J* 2000;23:485-491.
- e-23) Miyagi Y, Shima F, Ishido K, Moriguchi M, Kamikaseda K. Posteroventral pallidotomy for midbrain tremor after a pontine hemorrhage. Case report. *J Neurosurg.* 1999;91:885-888.
- e-24) Okuda B, Tachibana H, Sugita M, Maeda Y. Bilateral internuclear ophthalmoplegia, ataxia, and tremor from a midbrain infarction. *Stroke* 1993;24:481-482.

- e-25) Seidel S, Kasprian G, Leutmezer F, Prayer D, Auff E. Disruption of nigrostriatal and cerebellothalamic pathways in dopamine responsive Holmes' tremor. *J Neurol Neurosurg Psychiatry* 2009;80:921-923.
- e-26) Yerdelen D, Karatas M, Goksel B, Yildirim T. A patient with multiple sclerosis presenting with Holmes' tremor. *Eur J Neurol* 2008;15:e2-3.
- e-27) Roselli F, Livrea P, Defazio G, Manobianca G, Ardito B. Holmes' tremor associated to HSV-1 cerebral pedunculitis: a case report. *Mov Disord* 2007;22:1204-1206.
- e-28) Inci S, Celik O, Soylemezoglu F, Ozgen T. Thalamomesencephalic ossified cavernoma presenting with Holmes' tremor. *Surg Neurol* 2007;67:511-516.
- e-29) Akkus DE, Diramali AB. Postischemic delayed Holmes' tremor responding to low-dose cabergoline. *Mov Disord* 2006 ;21:733-734.
- e-30) Tan JH, Chan BP, Wilder-Smith EP, Ong BK. A unique case of reversible hyperglycemic Holmes' tremor. *Mov Disord* 2006;21:707-709.
- e-31) Nikkhah G, Prokop T, Hellwig B, Lücking CH, Ostertag CB. Deep brain stimulation of the nucleus ventralis intermedius for Holmes (rubral) tremor and associated dystonia caused by upper brainstem lesions. Report of two cases. *J Neurosurg* 2004;100:1079-1083.
- e-32) Krack P, Deuschl G, Kaps M, Warnke P, Schneider S, Traupe H. Delayed onset of "rubral tremor" 23 years after brainstem trauma. *Mov Disord* 1994;9:240-242.
- e-33) Bolen RD, Balakrishnan MDN. Palatal myoclonus, eight-and-a-half syndrome, and Holmes tremor in a patient from a single brainstem lesion. *J Neurol Sci* 2014;347:411-412.
- e-34) Romanelli P, Brontè-Stewart H, Courtney T, Heit G. Possible necessity for deep brain stimulation of both the ventralis intermedius and subthalamic nuclei to resolve Holmes tremor. Case report. *J Neurosurg* 2003;99:566-571.
- e-35) Sanborn MR, Danish SF, Ranalli NJ, Grady MS, Jaggi JL, Baltuch GH. Thalamic deep brain stimulation for midbrain tremor secondary to cystic degeneration of the brainstem. *Stereotact Funct Neurosurg* 2009;87:128-133.
- e-36) Kobayashi K, Katayama Y, Oshima H, et al. Multitarget, dual-electrode deep brain stimulation of the thalamus and subthalamic area for treatment of Holmes' tremor. *J Neurosurg*. 2014;120:1025-1032.
- e-37) Hertel F, Züchner M, Decker C, et al. Unilateral Holmes tremor, clearly responsive to cerebrospinal fluid release, in a patient with an ischemic midbrain lesion and associated chronic hydrocephalic ventricle enlargement. Case report. *J Neurosurg* 2006;104:448-451.
- e-38) Ferlazzo E, Morgante F, Rizzo V, et al. Successful treatment of Holmes tremor by levetiracetam. *Mov Disord* 2008;23:2101-2103.
- e-39) Brittain JS, Jenkinson N, Holland P, Joundi RA, Green AL, Aziz TZ.. Development of Holmes' tremor following hemi-cerebellar infarction. *Mov Disord* 2011;26:1957-1959.
- e-40) Kudo M, Goto S, Nishikawa S, et al. Bilateral thalamic stimulation for Holmes' tremor caused by unilateral brainstem lesion. *Mov Disord*. 2001;16:170-174.

- e-41) Rana AQ, Badar Z. Midbrain tremor: a tremor resistant to treatment. *Acta Neurol Belg.* 2012;112:167-169
- e-42) Rydz D, Lin CY, Xie T, Cortes E, Vonsattel JP, Kuo SH. Pathological findings of anti-Yo cerebellar degeneration with Holmes tremor. *J Neurol Neurosurg Psychiatry* 2015;86:121-122.
- e-43) Shen YC. Unilateral rubral tremor following treatment with risperidone. *World J Biol Psychiatry* 2009;10:629-631.
- e-44) Leung GK, Fan YW, Ho SL. Rubral tremor associated with cavernous angioma of the midbrain. *Mov Disord* 1999;14:191-193.
- e-45) Pomeranz S, Shalit M, Sherman Y. "Rubral" tremor following radiation of a pineal region vascular hamartoma. *Acta Neurochir (Wien)* 1990;103:79-81.
- e-46) Friedman JH. "Rubral" tremor induced by a neuroleptic drug. *Mov Disord* 1992;7:281-282.
- e-47) Samadani U, Umemura A, Jaggi JL, Colcher A, Zager EL, Baltuch GH. Thalamic deep brain stimulation for disabling tremor after excision of a midbrain cavernous angioma. Case report. *J Neurosurg* 2003;98:888-90.
- e-48) Jacob PC, Pratap Chand R. Posttraumatic rubral tremor responsive to clonazepam. *Mov Disord* 1998;13:977-978.
- e-49) Govaerts A, Van Zandijcke M, Dehaene I. Posthypoxic midbrain tremor. *Mov Disord* 1998;13:359-361.
- e-50) Simonetti F, Pergami P, Aktipi KM, et al. Paraneoplastic "rubral" tremor: a case report. *Mov Disord* 1998;13:612-614.
- e-51) Foote KD, Okun MS. Ventralis intermedius plus ventralis oralis anterior and posterior deep brain stimulation for posttraumatic Holmes tremor: two leads may be better than one: technical note. *Neurosurgery* 2005;56(2 Suppl):E445.
- e-52) Teive HA, Zanatta A, Germiniani FM, Almeida SM, Werneck LC. Holmes' tremor and neuroparacoccidioidomycosis: a case report. *Mov Disord* 2002;17:1392-1394.
